# Supplementary material for: Development, optimization and validation of modified QuEChERS based UPLC-MS/MS for simultaneous determination of nine steroid hormones in milk powder and milk
Source: Royal Society of Chemistry journal article supplement (doi:10.1039/d2nj02157a), 2022-01-01
Supplement: d2nj02157a1.pdf [file d2nj02157a1.pdf]

*Supporting information*

**Development, optimization and validation of modified QuEChERS  
based UPLC-MS/MS for simultaneous determination of nine steroid  
hormones in milk powder and milk**

4 Figure and 1 Table.

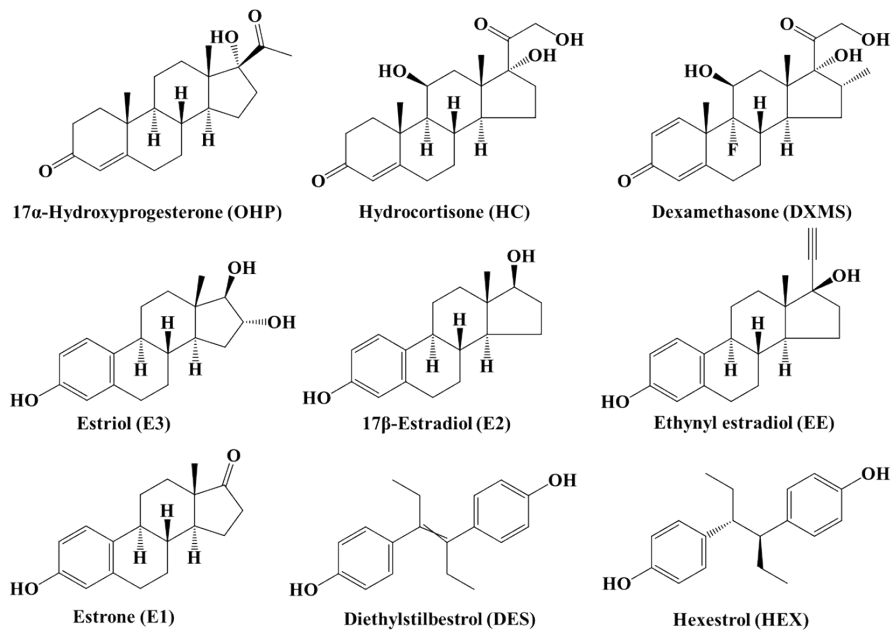

1

2 **Fig. S1.** Chemical structure, names, and abbreviation of the 9 steroid hormones  
 3 analyzed.

4

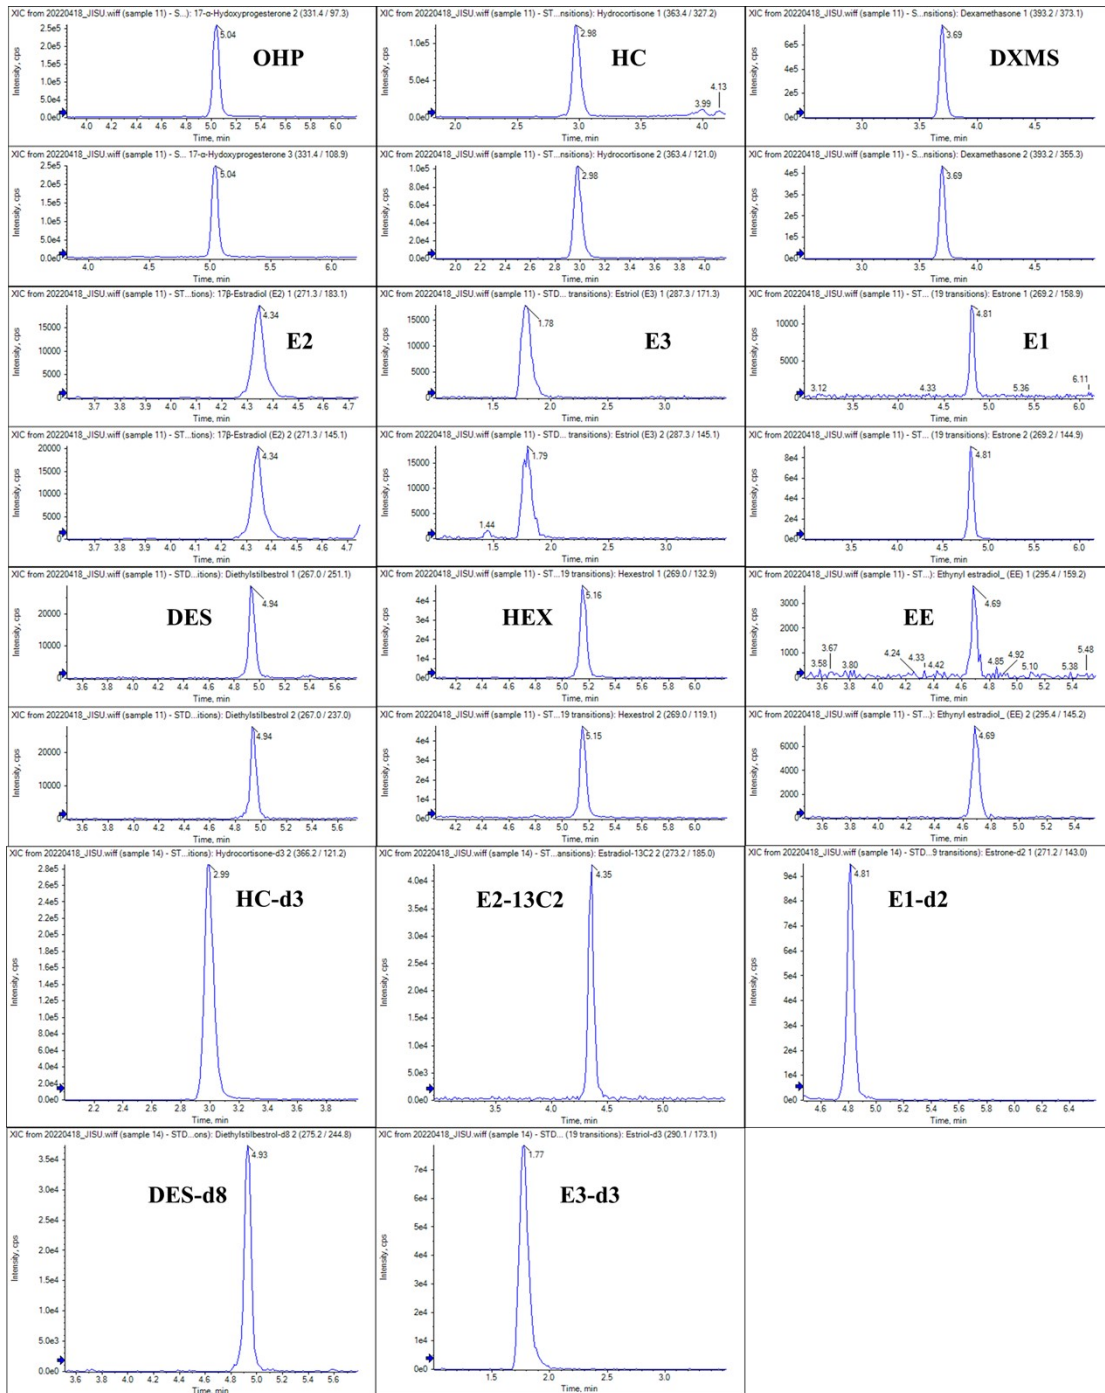

5

6 **Fig. S2.** UPLC–MS/MS quantitative and qualitative ion chromatograms of for each  
 7 compound in a milk powder sample spiked at 0.01 mg/L; HC-d5, E1-d2, E2-13C2, E3-  
 8 d3 and DES-d8 (IS) chromatograms.

9

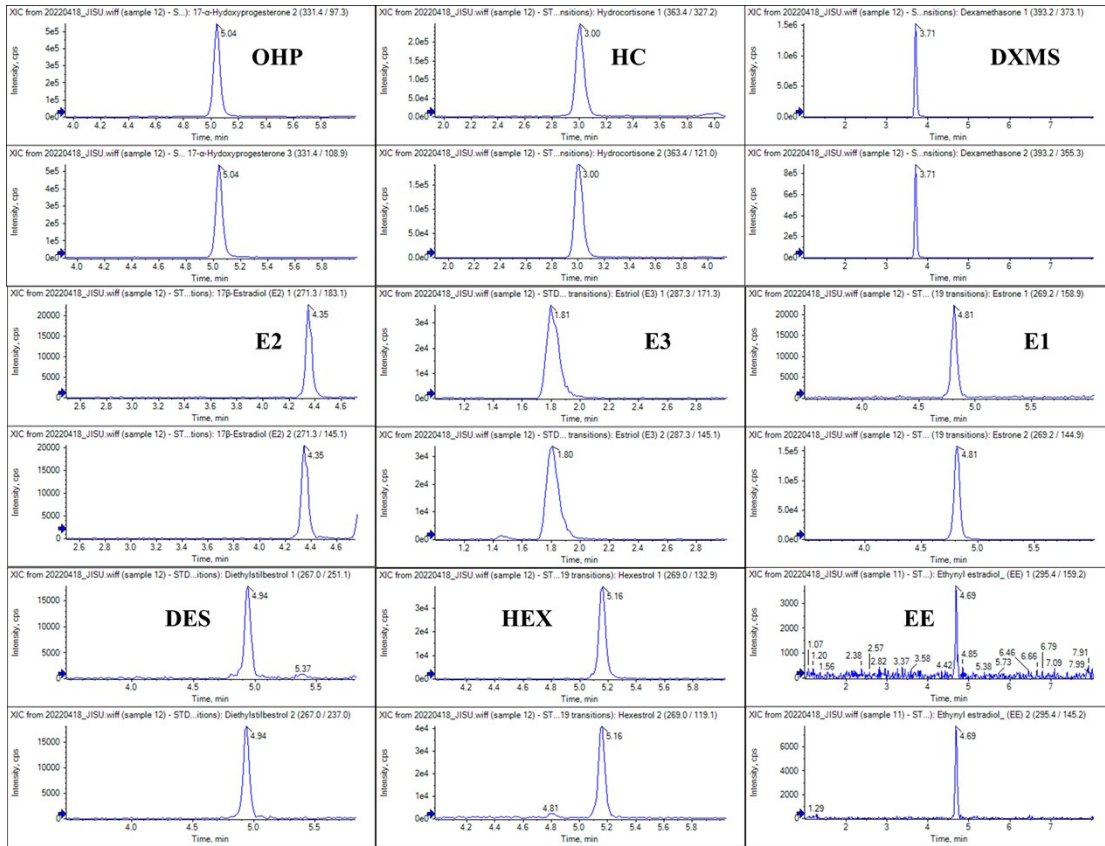

10

11 **Fig. S3.** UPLC–MS/MS quantitative and qualitative ion chromatograms of for each  
 12 compound in a milk sample spiked at 0.01 mg/L.

13

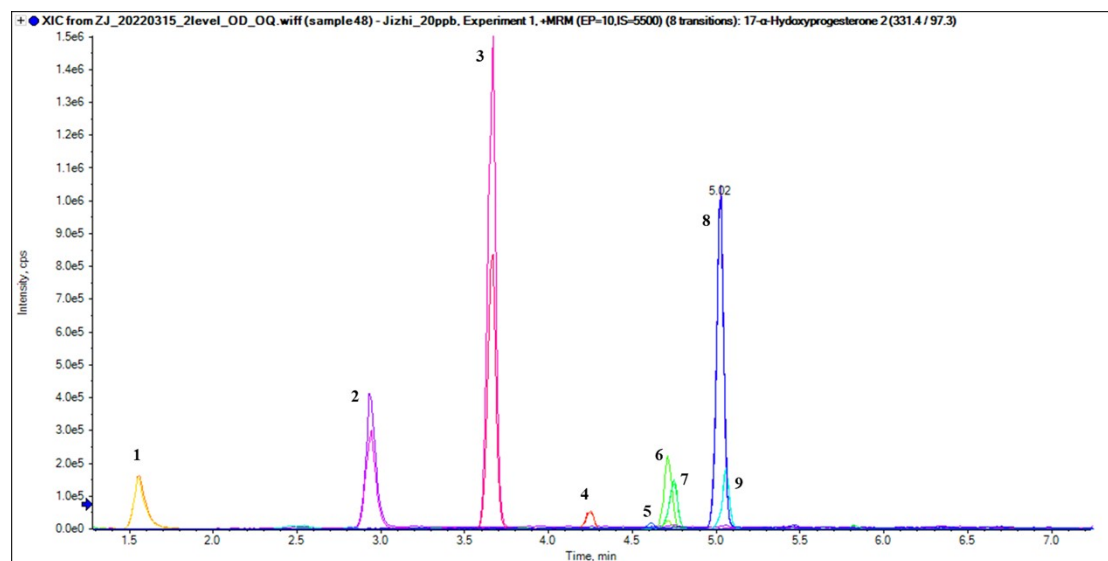

17 Table S1. Analysis of real milk powder and milk samples using the UPLC–MS/MS combined with modified QuEChERS method (n=3).

| Sample      | No. | Concentration of compound |              |      |      |      |             |      |      |      |
|-------------|-----|---------------------------|--------------|------|------|------|-------------|------|------|------|
|             |     | OHP                       | HC           | DXMS | E2   | E3   | E1          | DES  | HEX  | EE   |
| Milk powder | 1   | 0.92 ± 0.04               | 2.68 ± 0.41  | n.d. | n.d. | n.d. | 0.71 ± 0.05 | n.d. | n.d. | n.d. |
|             | 2   | 0.85 ± 0.06               | 3.35 ± 0.38  | n.d. | n.d. | n.d. | 0.46 ± 0.03 | n.d. | n.d. | n.d. |
|             | 3   | 1.05 ± 0.06               | 3.16 ± 0.36  | <LOQ | n.d. | n.d. | 0.70 ± 0.05 | n.d. | n.d. | n.d. |
|             | 4   | n.d.                      | 0.24 ± 0.03  | n.d. | <LOQ | n.d. | 0.43 ± 0.03 | n.d. | n.d. | n.d. |
|             | 5   | n.d.                      | 1.01 ± 0.04  | n.d. | n.d. | n.d. | 0.48 ± 0.04 | n.d. | n.d. | n.d. |
|             | 6   | 0.79 ± 0.02               | 1.76 ± 0.10  | n.d. | <LOQ | n.d. | 0.62 ± 0.05 | n.d. | n.d. | n.d. |
|             | 7   | 0.94 ± 0.06               | 1.45 ± 0.12  | n.d. | n.d. | n.d. | 0.71 ± 0.04 | n.d. | n.d. | n.d. |
| Milk        | 1   | <LOQ                      | 0.04 ± 0.005 | n.d. | n.d. | n.d. | 0.21 ± 0.03 | n.d. | n.d. | n.d. |
|             | 2   | <LOQ                      | n.d.         | n.d. | <LOQ | n.d. | 0.21 ± 0.03 | n.d. | n.d. | n.d. |
|             | 3   | 0.33 ± 0.03               | n.d.         | n.d. | <LOQ | n.d. | 0.27 ± 0.02 | n.d. | n.d. | n.d. |
|             | 4   | 0.30 ± 0.01               | n.d.         | n.d. | <LOQ | n.d. | 0.24 ± 0.01 | n.d. | n.d. | n.d. |

18 Note: n.d.: not detected.

19
